# Supplementary material for: Consensus on a Patient-Centered Definition of Atopic Dermatitis Flare
Source: PubMed Central journal article supplement — JAMA Dermatol. 2024 Sep 11;160(10):1099–106. doi: 10.1001/jamadermatol.2024.3054 (PMC11391363; doi:10.1001/jamadermatol.2024.3054), 2024-09-11
Supplement: jamadermatol-e243054-s002.pdf [file jamadermatol-e243054-s002.pdf]

## Data Sharing Statement

Drucker. Consensus on a Patient-Centered Definition of Atopic Dermatitis Flare. *JAMA Dermatol.* Published September 11, 2024. doi:10.1001/jamadermatol.2024.3054

### Data

**Data available:** No
